# Supplementary material for: The Tumor Immune Microenvironment in Primary CNS Neoplasms: A Review of Current Knowledge and Therapeutic Approaches
Source: MDPI journal article supplement (doi:10.3390/ijms24032020), 2023-01-19
Supplement: s1 [file s1]

**Supplementary Table S1| Current checkpoint inhibitor clinical trials for glioma that are active, recruiting, enrolling by invitation, or not yet recruiting**

| NCT Number  | Title                                                                                                                              | Status                 | Conditions                                                           | Interventions                                                                                            | Phase          | Enrollment | Start Date |
|-------------|------------------------------------------------------------------------------------------------------------------------------------|------------------------|----------------------------------------------------------------------|----------------------------------------------------------------------------------------------------------|----------------|------------|------------|
| NCT02658279 | Pembrolizumab (MK-3475) in Patients with Recurrent Malignant Glioma with a Hypermutator Phenotype                                  | Active, not recruiting | Glioma;<br>Recurrent Malignant Glioma                                | Pembrolizumab                                                                                            | Not Applicable | 27         | 22-Jan-16  |
| NCT02829931 | Hypofractionated Stereotactic Irradiation with Nivolumab, Ipilimumab and Bevacizumab in Patients with Recurrent High-Grade Gliomas | Active, not recruiting | Malignant Glioma                                                     | Hypofractionated Stereotactic Radiation<br>Nivolumab<br>Bevacizumab<br>Ipilimumab                        | Phase 1        | 33         | 22-Aug-16  |
| NCT02658981 | Anti-LAG-3 Alone & in Combination w/ Nivolumab Treating Patients w/ Recurrent GBM (Anti-CD137 Arm Closed 10/16/18)                 | Active, not recruiting | Glioblastoma;<br>Gliosarcoma;<br>Recurrent Brain Neoplasm            | Anti-LAG-3 Monoclonal Antibody<br>BMS 986016<br>Anti-CD137<br>Nivolumab                                  | Phase 1        | 63         | 24-Aug-16  |
| NCT03233152 | Intra-tumoral Ipilimumab Plus Intravenous Nivolumab Following the Resection of Recurrent Glioblastoma                              | Recruiting             | Glioblastoma                                                         | Ipilimumab<br>Nivolumab                                                                                  | Phase 1        | 6          | 17-Nov-16  |
| NCT03425292 | A Longitudinal Assessment of Tumor Evolution in Patients with Brain Cancer                                                         | Recruiting             | Newly Diagnosed High Grade Glioma                                    | Temozolomide<br>conformal brain radiation therapy<br>Nivolumab<br>Ipilimumab<br>Bevacizumab<br>Lomustine | Phase 1        | 90         | 1-Mar-18   |
| NCT03426891 | Pembrolizumab and Vorinostat Combined with Temozolomide for Newly Diagnosed Glioblastoma                                           | Active, not recruiting | Glioblastoma;<br>Brain Tumor;<br>GBM                                 | Pembrolizumab<br>Vorinosta<br>Temozolomide<br>Radiotherapy                                               | Phase 1        | 21         | 16-Mar-18  |
| NCT04047706 | Nivolumab, BMS-986205, and Radiation Therapy with or without Temozolomide in Treating Patients with Newly Diagnosed Glioblastoma   | Recruiting             | Glioblastoma                                                         | IDO1 Inhibitor BMS-986205<br>Nivolumab<br>Radiation Therapy<br>Temozolomide                              | Phase 1        | 30         | 13-Aug-19  |
| NCT04201873 | Pembrolizumab and a Vaccine (ATL-DC) for the Treatment of Surgically Accessible Recurrent Glioblastoma                             | Recruiting             | Recurrent Glioblastoma                                               | Dendritic Cell Tumor Cell Lysate<br>Vaccine<br>Pembrolizumab<br>Poly ICLC                                | Phase 1        | 40         | 8-Jan-20   |
| NCT04160494 | D2C7-IT With Atezolizumab for Recurrent Gliomas                                                                                    | Recruiting             | Malignant Glioma                                                     | D2C7-IT<br>Atezolizumab                                                                                  | Phase 1        | 18         | 20-Mar-20  |
| NCT04521686 | Study of LY3410738 Administered to Patients with Advanced Solid Tumors with IDH1 or IDH2 Mutations                                 | Recruiting             | Cholangiocarcinoma;<br>Chondrosarcoma;<br>Glioma;<br>Any Solid Tumor | LY3410738<br>Gemcitabine<br>Cisplatin<br>Durvalumab                                                      | Phase 1        | 200        | 20-Aug-20  |
| NCT04606316 | Surgical Nivolumab and Ipilimumab for Recurrent GBM                                                                                | Recruiting             | Glioblastoma;<br>GBM;                                                | Nivolumab<br>Ipilimumab<br>Surgery                                                                       | Phase 1        | 60         | 1-Feb-21   |

|             |                                                                                                                                          |                        |                                                              |                                                                 |           |    |           |
|-------------|------------------------------------------------------------------------------------------------------------------------------------------|------------------------|--------------------------------------------------------------|-----------------------------------------------------------------|-----------|----|-----------|
|             |                                                                                                                                          |                        | Glioblastoma Multiforme; Grade IV Astrocytoma                |                                                                 |           |    |           |
| NCT04826393 | ASP8374 + Cemiplimab in Recurrent Glioma                                                                                                 | Active, not recruiting | Glioblastoma; Recurrent Glioblastoma                         | ASP8374 Cemiplimab                                              | Phase 1   | 14 | 9-Mar-22  |
| NCT03277638 | Laser Interstitial Thermotherapy (LITT) Combined with Checkpoint Inhibitor for Recurrent GBM (RGBM)                                      | Recruiting             | Glioblastoma, Adult                                          | Pembrolizumab Laser Interstitial Thermotherapy                  | Phase 1/2 | 34 | 29-Nov-17 |
| NCT05053880 | A Study to Evaluate Safety and Efficacy of ACT001 and Anti-PD-1 in Patients with Surgically Accessible Recurrent Glioblastoma Multiforme | Recruiting             | Recurrent Glioblastoma Multiforme (GBM)                      | ACT001 Pembrolizumab                                            | Phase 1/2 | 48 | 22-Sep-21 |
| NCT04977375 | Trial of Anti-PD-1 Immunotherapy and Stereotactic Radiation in Patients with Recurrent Glioblastoma                                      | Recruiting             | Glioblastoma Multiforme                                      | Pembrolizumab Stereotactic Radiation Therapy Surgical Resection | Phase 1/2 | 30 | 9-Dec-21  |
| NCT05084430 | Study of Pembrolizumab and M032 (NSC 733972)                                                                                             | Active, not recruiting | Glioblastoma Multiforme; Anaplastic Astrocytoma; Gliosarcoma | M032 Pembrolizumab                                              | Phase 1/2 | 28 | 25-Feb-22 |
| NCT02337686 | Pembrolizumab in Treating Patients with Recurrent Glioblastoma                                                                           | Active, not recruiting | Recurrent Glioblastoma; Recurrent Gliosarcoma                | Pembrolizumab Conventional Surgery                              | Phase 2   | 20 | 28-Apr-15 |
| NCT03018288 | Radiation Therapy Plus Temozolomide and Pembrolizumab with and without HSPPC-96 in Newly Diagnosed Glioblastoma (GBM)                    | Active, not recruiting | Glioblastoma                                                 | Pembrolizumab HSPPC-96 Temozolomide                             | Phase 2   | 90 | 21-Sep-17 |
| NCT03452579 | Nivolumab Plus Standard Dose Bevacizumab Versus Nivolumab Plus Low Dose Bevacizumab in GBM                                               | Active, not recruiting | Glioblastoma                                                 | Nivolumab Low Dose Bevacizumab Standard Dose Bevacizumab        | Phase 2   | 90 | 21-May-18 |
| NCT03557359 | Nivolumab for Recurrent or Progressive IDH Mutant Gliomas                                                                                | Active, not recruiting | Gliomas                                                      | Nivolumab                                                       | Phase 2   | 20 | 12-Jun-18 |
| NCT03661723 | Pembrolizumab and Reirradiation in Bevacizumab Naïve and Bevacizumab Resistant Recurrent Glioblastoma                                    | Active, not recruiting | Glioblastoma                                                 | Pembrolizumab Bevacizumab Re-irradiation                        | Phase 2   | 61 | 28-Sep-18 |
| NCT04056910 | Ivosidenib (AG-120) with Nivolumab in IDH1 Mutant Tumors                                                                                 | Recruiting             | Advanced Solid Tumor; IDH1 Mutation Glioma                   | Ivosidenib Nivolumab                                            | Phase 2   | 35 | 14-Aug-19 |
| NCT03718767 | Nivolumab in Patients with IDH-Mutant Gliomas with and without Hypermutator Phenotype                                                    | Recruiting             | Glioma; Glioblastoma; High Grade Glioma; Low Grade Glioma;   | Nivolumab                                                       | Phase 2   | 95 | 27-Mar-19 |

|             |                                                                                                                                                             |                        |                                                                                                                                   |                                                                                                    |         |     |           |
|-------------|-------------------------------------------------------------------------------------------------------------------------------------------------------------|------------------------|-----------------------------------------------------------------------------------------------------------------------------------|----------------------------------------------------------------------------------------------------|---------|-----|-----------|
|             |                                                                                                                                                             |                        | Malignant Glioma                                                                                                                  |                                                                                                    |         |     |           |
| NCT03743662 | Nivolumab with Radiation Therapy and Bevacizumab for Recurrent MGMT Methylated Glioblastoma                                                                 | Active, not recruiting | Glioblastoma                                                                                                                      | Re-irradiation<br>Bevacizumab<br>Nivolumab<br>Re-resection                                         | Phase 2 | 39  | 12-Nov-18 |
| NCT03899857 | Pembrolizumab for Newly Diagnosed Glioblastoma                                                                                                              | Active, not recruiting | Newly Diagnosed Glioblastoma                                                                                                      | Pembrolizumab                                                                                      | Phase 2 | 56  | 21-Oct-20 |
| NCT04013672 | Study of Pembrolizumab Plus SurVaxM for Glioblastoma at First Recurrence                                                                                    | Active, not recruiting | Recurrent Glioblastoma                                                                                                            | Pembrolizumab<br>SurVaxM<br>Sargramostim<br>Montanide ISA 51                                       | Phase 2 | 40  | 19-Mar-20 |
| NCT04145115 | A Study Testing the Effect of Immunotherapy (Ipilimumab and Nivolumab) in Patients with Recurrent Glioma with Elevated Mutational Burden                    | Recruiting             | Diffuse Glioma;<br>Recurrent Astrocytoma, IDH-Mutant, Grade 4;<br>Recurrent Glioblastoma, IDH-Wildtype;<br>Secondary Glioblastoma | Ipilimumab<br>Nivolumab                                                                            | Phase 2 | 37  | 30-Oct-20 |
| NCT04195139 | Nivolumab and Temozolomide Versus Temozolomide Alone in Newly Diagnosed Elderly Patients With GBM                                                           | Active, not recruiting | Glioblastoma Multiforme                                                                                                           | Nivolumab<br>Temozolomide                                                                          | Phase 2 | 103 | 22-Feb-18 |
| NCT04479241 | LUMINOS-101: Lerapolturev (PVSRIPO) and Pembrolizumab in Patients with Recurrent Glioblastoma                                                               | Active, not recruiting | Glioblastoma;<br>Recurrent Glioblastoma;<br>Supratentorial Glioblastoma;<br>Brain Tumor                                           | Lerapolturev<br>pembrolizumab                                                                      | Phase 2 | 30  | 21-Oct-20 |
| NCT04583020 | Neoadjuvant PD-1 in Newly Diagnosed Glioblastoma                                                                                                            | Recruiting             | Glioblastoma                                                                                                                      | Camrelizumab<br>Radiation<br>Temozolomide                                                          | Phase 2 | 42  | 12-Nov-20 |
| NCT04588987 | Neoadjuvant Carilizumab and Apatinib for Recurrent High-Grade Glioma                                                                                        | Recruiting             | Neoadjuvant Therapy;<br>Carilizumab;<br>Apatinib;<br>Recurrent High-Grade Glioma                                                  | Biological: PD-1                                                                                   | Phase 2 | 60  | Oct-20    |
| NCT04729959 | Testing the Addition of the Immune Therapy Drugs, Tocilizumab and Atezolizumab, to Radiation Therapy for Recurrent Glioblastoma                             | Recruiting             | Diffuse Astrocytoma, IDH-Wildtype;<br>Recurrent Glioblastoma                                                                      | Atezolizumab<br>Conventional Surgery<br>Fractionated Stereotactic Radiation Therapy<br>Tocilizumab | Phase 2 | 12  | 6-Jul-21  |
| NCT04817254 | Association of Peripheral Blood Immunologic Response to Therapeutic Response to Adjuvant Treatment with Immune Checkpoint Inhibition (ICI) in Patients with | Recruiting             | Glioblastoma;<br>Gliosarcoma;<br>Malignant Glioma                                                                                 | TMZ<br>Ipilimumab<br>Nivolumab                                                                     | Phase 2 | 48  | 8-Dec-21  |

|             |                                                                                                                                                                                         |                        |                                                                                          |                                                        |         |     |           |
|-------------|-----------------------------------------------------------------------------------------------------------------------------------------------------------------------------------------|------------------------|------------------------------------------------------------------------------------------|--------------------------------------------------------|---------|-----|-----------|
|             | Newly Diagnosed Glioblastoma or Gliosarcoma                                                                                                                                             |                        |                                                                                          |                                                        |         |     |           |
| NCT04952571 | Combined Treatment of Camrelizumab and Bevacizumab for Adult Patients with Recurrent Glioblastoma (GBM)                                                                                 | Recruiting             | Recurrent Glioblastoma                                                                   | Camrelizumab<br>Bevacizumab                            | Phase 2 | 94  | 1-May-21  |
| NCT05074992 | A Trial of Neoadjuvant Therapy in Patients with Newly Diagnosed Glioblastoma                                                                                                            | Recruiting             | Glioblastoma                                                                             | Drug: Ipilimumab                                       | Phase 2 | 43  | 24-Aug-22 |
| NCT05366062 | ERC1671 to Treat Malignant Gliomas When Given in Combination With GM-CSF, Cyclophosphamide, Bevacizumab and Pembrolizumab                                                               | Not yet recruiting     | Glioma, Malignant                                                                        | ERC1671<br>GM-CSF<br>Cyclophosphamide<br>Pembrolizumab | Phase 2 | 28  | 1-Jul-22  |
| NCT05465954 | Efineptakin Alfa and Pembrolizumab for the Treatment of Recurrent Glioblastoma                                                                                                          | Not yet recruiting     | High Grade Astrocytic Tumor; Recurrent Glioblastoma, IDH-Wildtype; Recurrent Gliosarcoma | Efineptakin alfa<br>Pembrolizumab                      | Phase 2 | 34  | 15-Nov-22 |
| NCT02017717 | A Study of the Effectiveness and Safety of Nivolumab Compared to Bevacizumab and of Nivolumab with or Without Ipilimumab in Glioblastoma Patients                                       | Active, not recruiting | Recurrent Glioblastoma                                                                   | Nivolumab<br>Bevacizumab<br>Ipilimumab                 | Phase 3 | 529 | 7-Feb-14  |
| NCT02667587 | An Investigational Immunotherapy Study of Temozolomide Plus Radiation Therapy with Nivolumab or Placebo, for Newly Diagnosed Patients with Glioblastoma (GBM, a Malignant Brain Cancer) | Active, not recruiting | Brain Neoplasms                                                                          | Nivolumab<br>Temozolomide<br>Radiotherapy              | Phase 3 | 716 | 9-May-16  |
| NCT05235737 | The Assessment of Immune Response in Newly Diagnosed Glioblastoma Patients Treated with Pembrolizumab                                                                                   | Not yet recruiting     | Newly Diagnosed Glioblastoma                                                             | Pembrolizumab                                          | Phase 4 | 36  | 1-Mar-22  |

Results obtained from [clinicaltrials.gov](https://clinicaltrials.gov) by searching entries with Glioma OR GBM OR Glioblastoma and selecting relevant studies investigating checkpoint inhibitors (excluding missing info, unknown status, and pediatric tumors)

**Supplementary Table S2| Current checkpoint inhibitor clinical trials for meningioma that are active, recruiting, enrolling by invitation, or not yet recruiting**

| NCT Number  | Title                                                                                                                                         | Status                 | Conditions                                                                                               | Interventions                                                                                                | Phases          | Enrollment | Start Date |
|-------------|-----------------------------------------------------------------------------------------------------------------------------------------------|------------------------|----------------------------------------------------------------------------------------------------------|--------------------------------------------------------------------------------------------------------------|-----------------|------------|------------|
| NCT04728568 | Exploratory Study of PD-1 Neoadjuvant Treatment of Recurrent Meningioma                                                                       | Recruiting             | Meningioma, Malignant                                                                                    | Sintilimab                                                                                                   | Not Applicable  | 15         | 1-Jun-20   |
| NCT03267836 | Neoadjuvant Avelumab and Hypofractionated Proton Radiation Therapy Followed by Surgery for Recurrent Radiation-refractory Meningioma          | Active, not recruiting | Meningioma; Meningioma, Adult                                                                            | Avelumab<br>Proton Therapy<br>Surgery                                                                        | Phase 1         | 9          | 10-Jan-18  |
| NCT03604978 | Nivolumab and Multi-fraction Stereotactic Radiosurgery with or Without Ipilimumab in Treating Patients with Recurrent Grade II-III Meningioma | Recruiting             | Grade 2 Meningioma; Grade 3 Meningioma; Recurrent Meningioma                                             | Ipilimumab<br>Nivolumab<br>Stereotactic Radiosurgery                                                         | Phase 1 Phase 2 | 15         | 21-Nov-18  |
| NCT02648997 | An Open-Label Phase II Study of Nivolumab in Adult Participants with Recurrent High-Grade Meningioma                                          | Recruiting             | Meningiomas                                                                                              | Nivolumab - 240 mg<br>Ipilimumab - 1 mg/kg<br>Nivolumab - 480 mg<br>Nivolumab - 3 mg/kg <br>External Beam RT | Phase 2         | 50         | Mar-16     |
| NCT03173950 | Immune Checkpoint Inhibitor Nivolumab in People with Recurrent Select Rare CNS Cancers                                                        | Recruiting             | Medulloblastoma; Ependymoma; Pineal Region Tumors; Choroid Plexus Tumors; Atypical/Malignant Meningioma  | Nivolumab                                                                                                    | Phase 2         | 180        | 13-Jul-17  |
| NCT03279692 | Phase II Trial of Pembrolizumab in Recurrent or Residual High-Grade Meningioma                                                                | Active, not recruiting | High Grade Meningioma                                                                                    | Pembrolizumab                                                                                                | Phase 2         | 26         | 7-Nov-17   |
| NCT04659811 | Stereotactic Radiosurgery and Immunotherapy (Pembrolizumab) for the Treatment of Recurrent Meningioma                                         | Recruiting             | Grade I Meningioma, Adult; Grade II Meningioma, Adult; Grade III Meningioma, Adult; Recurrent Meningioma | Pembrolizumab<br>Stereotactic Radiosurgery                                                                   | Phase 2         | 90         | 25-Mar-21  |

Results obtained from clinicaltrials.gov by searching entries with meningioma and selecting relevant studies investigating checkpoint inhibitors (excluding missing info, unknown status, and pediatric tumors)

**Supplementary Table S3| Current vaccine clinical trials for glioma that are active, recruiting, enrolling by invitation, or not yet recruiting**

| NCT Number  | Title                                                                                                        | Status                 | Conditions                                                                                                                      | Interventions                                                                                  | Phases         | Enrollment | Start Date |
|-------------|--------------------------------------------------------------------------------------------------------------|------------------------|---------------------------------------------------------------------------------------------------------------------------------|------------------------------------------------------------------------------------------------|----------------|------------|------------|
| NCT05557240 | Neoantigens Phase I Trial in Newly Diagnosed Glioblastoma Patients                                           | Recruiting             | Glioma, Malignant                                                                                                               | NeoPep Vaccine1 plus Poly-ICLC<br>NeoPep Vaccine2 plus Poly-ICLC                               | Not Applicable | 10         | 13-Sep-22  |
| NCT01957956 | Vaccine Therapy and Temozolomide in Treating Patients with Newly Diagnosed Glioblastoma                      | Active, not recruiting | Giant Cell Glioblastoma;<br>Glioblastoma;<br>Gliosarcoma                                                                        | Malignant Glioma Tumor Lysate-Pulsed Autologous Dendritic Cell Vaccine<br>Temozolomide         | Early Phase 1  | 21         | 11-Nov-13  |
| NCT03360708 | Vaccine Therapy in Treating Patients with Recurrent Glioblastoma                                             | Active, not recruiting | Giant Cell Glioblastoma;<br>Recurrent Glioblastoma;<br>Recurrent Gliosarcoma                                                    | Malignant Glioma Tumor Lysate-Pulsed Autologous Dendritic Cell Vaccine                         | Early Phase 1  | 20         | 3-Jun-19   |
| NCT00639639 | Vaccine Therapy in Treating Patients with Newly Diagnosed Glioblastoma Multiforme                            | Active, not recruiting | Malignant Neoplasms of Brain                                                                                                    | Tetanus toxoid<br>Therapeutic autologous dendritic cells<br>Therapeutic autologous lymphocytes | Phase 1        | 42         | Jan-06     |
| NCT02287428 | Personalized NeoAntigen Cancer Vaccine w RT Plus Pembrolizumab for Patients with Newly Diagnosed GBM         | Recruiting             | Glioblastoma                                                                                                                    | Radiation Therapy<br>Personalized NeoAntigen Vaccine<br>Pembrolizumab<br>Temozolomide          | Phase 1        | 56         | Nov-14     |
| NCT02193347 | IDH1 Peptide Vaccine for Recurrent Grade II Glioma (RESIST)                                                  | Active, not recruiting | Brain Cancer;<br>Brain Neoplasm, Primary;<br>Brain Neoplasms, Recurrent;<br>Brain Tumor<br>Cancer of the Brain                  | PEPIDH1M vaccine<br>Tetanus-Diphtheria Toxoid (Td)<br>Temozolomide                             | Phase 1        | 24         | 28-Jan-16  |
| NCT02549833 | Neo-adjuvant Evaluation of Glioma Lysate Vaccines in WHO Grade II Glioma                                     | Active, not recruiting | Oligodendroglioma;<br>Astrocytoma, Grade II;<br>Glioma, Astrocytic;<br>Glioma; Malignant;<br>Glioma;<br>Oligoastrocytoma, Mixed | GBM6-AD and poly-ICLC before and after surgery<br>GBM6-AD and poly-ICLC after surgery only     | Phase 1        | 28         | 17-Oct-16  |
| NCT02924038 | A Study of Varlilumab and IMA950 Vaccine Plus Poly-ICLC in Patients with WHO Grade II Low-Grade Glioma (LGG) | Active, not recruiting | Glioma;<br>Malignant Glioma;<br>Astrocytoma, Grade II;<br>Oligodendroglioma;<br>Glioma, Astrocytic;<br>Oligoastrocytoma, Mixed  | IMA950<br>poly-ICLC<br>Varlilumab                                                              | Phase 1        | 14         | 3-Apr-2017 |
| NCT03893903 | AMPLIFYing NEOepitope-specific VACCine Responses in Progressive Diffuse Glioma                               | Recruiting             | Malignant Glioma                                                                                                                | IDH1R132H peptide vaccine<br>Avelumab                                                          | Phase 1        | 60         | 19-Oct-18  |

|             |                                                                                                                                                           |                         |                                                |                                                                                                                |                 |    |           |
|-------------|-----------------------------------------------------------------------------------------------------------------------------------------------------------|-------------------------|------------------------------------------------|----------------------------------------------------------------------------------------------------------------|-----------------|----|-----------|
| NCT03914768 | Immune Modulatory DC Vaccine Against Brain Tumor                                                                                                          | Enrolling by invitation | Diffuse Intrinsic Pontine Glioma; Glioblastoma | Immunomodulatory DC vaccine to target DIPG and GBM                                                             | Phase 1         | 10 | 31-Mar-19 |
| NCT04201873 | Pembrolizumab and a Vaccine (ATL-DC) for the Treatment of Surgically Accessible Recurrent Glioblastoma                                                    | Recruiting              | Recurrent Glioblastoma                         | Dendritic Cell Tumor Cell Lysate Vaccine<br>Pembrolizumab<br>Poly ICLC                                         | Phase 1         | 40 | 8-Jan-20  |
| NCT04642937 | Study of CD200 Activation Receptor Ligand (CD200AR-L) and Allogeneic Tumor Lysate Vaccine Immunotherapy for Recurrent Glioblastoma                        | Active, not recruiting  | Glioblastoma                                   | hPIA8                                                                                                          | Phase 1         | 24 | 1-Dec-20  |
| NCT04842513 | Multi Peptide Vaccination with XS15 in Addition to Standard Postoperative Radiation Therapy and Temozolomide Chemotherapy in Newly Diagnosed Glioblastoma | Recruiting              | Glioblastoma<br>Multiforme of Brain            | Multipeptide plus XS15                                                                                         | Phase 1         | 15 | 3-May-21  |
| NCT04943718 | Personalized Vaccine for Patients with Recurrent Malignant Glioma                                                                                         | Recruiting              | Malignant Glioma;<br>Recurrent Glioma          | Personalized vaccine                                                                                           | Phase 1         | 10 | 15-Jul-21 |
| NCT04968366 | Safety & Efficacy of DC Vaccine and TMZ for the Treatment of Newly diagnosed Glioblastoma After Surgery                                                   | Recruiting              | Glioblastoma<br>Multiforme of Brain            | Autologous dendritic cells pulsed with multiple neoantigen peptides<br>Temozolomide adjuvant chemotherapy      | Phase 1         | 10 | 30-Jul-21 |
| NCT04552886 | Dendritic Cell Vaccination with Standard Postoperative Chemoradiation for the Treatment of Adult Glioblastoma                                             | Recruiting              | Glioblastoma                                   | TH-1 Dendritic Cell Immunotherapy                                                                              | Phase 1         | 24 | 11-Oct-21 |
| NCT04963413 | RENEW: Feasibility of CMV RNA-Pulsed Dendritic Cells Vaccines for the Treatment of Newly Diagnosed Glioblastoma Patients.                                 | Recruiting              | Glioblastoma                                   | Autologous DCs derived from PBMC loaded with RNA encoding the human CMV matrix protein pp65-flLAMP plus GM-CSF | Phase 1         | 10 | 13-Jan-22 |
| NCT05283109 | ETAPA I: Peptide-based Tumor Associated Antigen Vaccine in GBM                                                                                            | Not yet recruiting      | Glioma, Malignant                              | Tumor Associated Antigen Peptide Vaccine<br>P30-EPS Vaccine<br>Hiltonol                                        | Phase 1         | 36 | Nov-22    |
| NCT04801147 | Immunotherapy With Autologous Tumor Lysate-Loaded Dendritic Cells In Patients with Newly Diagnosed Glioblastoma Multiforme                                | Recruiting              | Glioblastoma                                   | Biological: Dendritic Cells Vaccine                                                                            | Phase 1 Phase 2 | 76 | Jun-10    |
| NCT02649582 | Adjuvant Dendritic Cell-immunotherapy Plus Temozolomide in Glioblastoma Patients                                                                          | Recruiting              | Glioblastoma<br>Multiforme of Brain            | Dendritic cell vaccine plus temozolomide chemotherapy                                                          | Phase 1 Phase 2 | 20 | Dec-15    |
| NCT03382977 | Study to Evaluate Safety, Tolerability, and Optimal Dose of Candidate GBM Vaccine VBI-1901 in Recurrent GBM Subjects                                      | Active, not recruiting  | Glioblastoma<br>Multiforme                     | VBI-190<br>Carmustine<br>Lomustine                                                                             | Phase 1 Phase 2 | 98 | 6-Dec-17  |
| NCT04116658 | First-in-Human, Phase 1b/2a Trial of a Multipeptide Therapeutic Vaccine                                                                                   | Recruiting              | Glioblastoma, Adult                            | Multiple doses of EO2401                                                                                       | Phase 1 Phase 2 | 52 | 13-Jul-20 |

|             |                                                                                                                                                      |                        |                                                                                                   |                                                                                                                                                              |                 |     |           |
|-------------|------------------------------------------------------------------------------------------------------------------------------------------------------|------------------------|---------------------------------------------------------------------------------------------------|--------------------------------------------------------------------------------------------------------------------------------------------------------------|-----------------|-----|-----------|
|             | in Patients with Progressive Glioblastoma                                                                                                            |                        |                                                                                                   |                                                                                                                                                              |                 |     |           |
| NCT04388033 | Clinical Study of an Dendritic and Glioma Cells Fusion Vaccine With IL-12 for Treatment-naïve GBM Patients.                                          | Recruiting             | Glioblastoma; Glioma; Neoplasms, Neuroepithelial; Neuroectodermal Tumors; Neoplasms, Nerve Tissue | Dendritic Cell Tumor Fusion Vaccine Interleukin-12 Temozolomide                                                                                              | Phase 1 Phase 2 | 10  | Dec-20    |
| NCT01204684 | Dendritic Cell Vaccine for Patients with Brain Tumors                                                                                                | Active, not recruiting | Glioma; Anaplastic Astrocytoma; Anaplastic Astro-oligodendroglioma; Glioblastoma                  | Autologous tumor lysate-pulsed DC vaccination<br>Tumor lysate-pulsed DC vaccination+0.2% resiquimod<br>Tumor-lysate pulsed DC vaccination +adjuvant polyICLC | Phase 2         | 60  | 8-Oct-10  |
| NCT01814813 | Vaccine Therapy with Bevacizumab Versus Bevacizumab Alone in Treating Patients with Recurrent Glioblastoma Multiforme That Can Be Removed by Surgery | Active, not recruiting | Recurrent Glioblastoma; Recurrent Adult Brain Tumor; Gliosarcoma                                  | HSPPC-96 Bevacizumab                                                                                                                                         | Phase 2         | 90  | May-13    |
| NCT02358187 | A Vaccine Trial for Low Grade Gliomas                                                                                                                | Recruiting             | Low Grade Glioma                                                                                  | HLA-A2 Restricted Glioma Antigen-Peptides with Poly-ICLC                                                                                                     | Phase 2         | 25  | Jan-15    |
| NCT02455557 | SurVaxM Vaccine Therapy and Temozolomide in Treating Patients with Newly Diagnosed Glioblastoma                                                      | Active, not recruiting | Glioblastoma; Gliosarcoma                                                                         | Montanide ISA 51 VG<br>Sargramostim<br>SVN53-67/M57-KLH Peptide Vaccine<br>Temozolomide                                                                      | Phase 2         | 66  | 4-May-15  |
| NCT02465268 | Vaccine Therapy for the Treatment of Newly Diagnosed Glioblastoma Multiforme                                                                         | Recruiting             | Glioblastoma Multiforme; Glioblastoma; Malignant Glioma Astrocytoma, Grade IV; GBM                | pp65-shLAMP DC with GM-CSF unpulsed PBMC and saline<br>pp65-flLAMP DC with GM-CSF                                                                            | Phase 2         | 175 | Aug-16    |
| NCT03395587 | Efficiency of Vaccination with Lysate-loaded Dendritic Cells in Patients with Newly Diagnosed Glioblastoma                                           | Recruiting             | Glioblastoma                                                                                      | Autologous, tumor lysate-loaded, mature dendritic cells (DC) standard therapy                                                                                | Phase 2         | 136 | 6-Mar-18  |
| NCT03400917 | Autologous Dendritic Cells Loaded with Autologous Tumor Associated Antigens for Treatment of Newly Diagnosed Glioblastoma                            | Active, not recruiting | Newly Diagnosed Glioblastoma                                                                      | Biological: AV-GBM-1                                                                                                                                         | Phase 2         | 55  | 20-Jun-18 |
| NCT03688178 | DC Migration Study to Evaluate TReg Depletion in GBM Patients with and Without Varlilumab                                                            | Recruiting             | Glioblastoma                                                                                      | Human CMV pp65-LAMP mRNA-pulsed autologous DCs<br>Temozolomide Varlilumab<br>Unpulsed DCs                                                                    | Phase 2         | 80  | 26-Aug-20 |
| NCT04523688 | Vaccination With Autologous Dendritic Cells Loaded with                                                                                              | Not yet recruiting     | Glioblastoma                                                                                      | Autologous Dendritic Cells (DC) vaccine                                                                                                                      | Phase 2         | 28  | Mar-21    |



|             |                                                                                                            |                        |                                                                                                                             |                                                        |                 |     |           |
|-------------|------------------------------------------------------------------------------------------------------------|------------------------|-----------------------------------------------------------------------------------------------------------------------------|--------------------------------------------------------|-----------------|-----|-----------|
|             | Autologous Tumour Homogenate in Glioblastoma                                                               |                        |                                                                                                                             | Temozolomide                                           |                 |     |           |
| NCT04888611 | Neoadjuvant PD-1 Antibody Alone or Combined with DC Vaccines for Recurrent Glioblastoma                    | Recruiting             | Recurrent Glioblastoma                                                                                                      | Camrelizumab plus GSC-DCV<br>Camrelizumab plus Placebo | Phase 2         | 40  | 26-Oct-21 |
| NCT05163080 | SurVaxM Plus Adjuvant Temozolomide for Newly Diagnosed Glioblastoma (SURVIVE)                              | Recruiting             | Newly Diagnosed Glioblastoma                                                                                                | SurVaxM                                                | Phase 2         | 265 | 18-Nov-21 |
| NCT03548571 | Dendritic Cell Immunotherapy Against Cancer Stem Cells in Glioblastoma Patients Receiving Standard Therapy | Active, not recruiting | Glioblastoma                                                                                                                | Dendritic cell immunization<br>Adjuvant temozolomide   | Phase 2 Phase 3 | 60  | 26-Apr-18 |
| NCT00045968 | Study of a Drug [DCVax®-L] to Treat Newly Diagnosed GBM Brain Cancer                                       | Active, not recruiting | Glioblastoma<br>Multiforme;<br>Glioblastoma;<br>GBM;<br>Grade IV<br>Astrocytoma;<br>Glioma;<br>Brain Cancer;<br>Brain Tumor | Dendritic cell immunotherapy                           | Phase 3         | 348 | Dec-06    |
| NCT04277221 | ADCTA for Adjuvant Immunotherapy in Standard Treatment of Recurrent Glioblastoma Multiforme (GBM)          | Recruiting             | Glioblastoma<br>Multiforme                                                                                                  | Autologous Dendritic Cell/Tumor Antigen, ADCTA         | Phase 3         | 118 | 19-Sep-19 |
| NCT05100641 | AV-GBM-1 vs Control as Adjunctive Therapy After RT/TMZ for Newly Diagnosed GBM                             | Not yet recruiting     | Primary Glioblastoma                                                                                                        | AV-GBM-Autologous monocytes                            | Phase 3         | 726 | Mar-22    |

Results obtained from [clinicaltrials.gov](https://clinicaltrials.gov) by searching entries with Glioma OR GBM OR Glioblastoma AND vaccine and selecting relevant studies (Excluding missing info, unknown status, and pediatric tumors)

**Supplementary Table S4| Current CAR-T cell clinical trials in glioma that are active, recruiting, enrolling by invitation, or not yet recruiting**

| NCT Number  | Title                                                                                                     | Status                  | Conditions                                                                                                                                                                                                                               | Interventions                                                                                                                                                                                                                          | Phases         | Enrollment | Start Date |
|-------------|-----------------------------------------------------------------------------------------------------------|-------------------------|------------------------------------------------------------------------------------------------------------------------------------------------------------------------------------------------------------------------------------------|----------------------------------------------------------------------------------------------------------------------------------------------------------------------------------------------------------------------------------------|----------------|------------|------------|
| NCT04717999 | Pilot Study of NKG2D CAR-T in Treating Patients with Recurrent Glioblastoma                               | Not yet recruiting      | Recurrent Glioblastoma                                                                                                                                                                                                                   | NKG2D CAR-T                                                                                                                                                                                                                            | Not Applicable | 20         | 1-Sep-21   |
| NCT05024175 | Long-term Follow-up of Subjects Treated with CARv3-TEAM-E T Cells                                         | Not yet recruiting      | Glioblastoma Recurrent, EGFR vIII Mutant; Newly Diagnosed Glioblastoma, EGFRvIII Mutant; Recurrent Glioblastoma, EGFR vIII Negative                                                                                                      | CARv3-TEAM-E T cells                                                                                                                                                                                                                   | Not Applicable | 18         | Dec-21     |
| NCT02208362 | Genetically Modified T-cells in Treating Patients with Recurrent or Refractory Malignant Glioma           | Active, not recruiting  | Recurrent Glioblastoma; Recurrent Malignant Glioma; Recurrent WHO Grade II Glioma; Recurrent WHO Grade III Glioma; Refractory Glioblastoma; Refractory Malignant Glioma; Refractory WHO Grade II Glioma; Refractory WHO Grade III Glioma | IL13Ralpha2-specific Hinge-optimized 4-1BB-co-stimulatory CAR/Truncated CD19-expressing Autologous TN/MEM Cells<br><br>IL13Ralpha2-specific Hinge-optimized 41BB-co-stimulatory CAR Truncated CD19-expressing Autologous T-Lymphocytes | Phase 1        | 82         | 18-May-15  |
| NCT03423992 | Personalized Chimeric Antigen Receptor T Cell Immunotherapy for Patients with Recurrent Malignant Gliomas | Recruiting              | Glioma; Malignant Glioma of Brain                                                                                                                                                                                                        | Chimeric antigen receptor T cells                                                                                                                                                                                                      | Phase 1        | 100        | 2-Mar-18   |
| NCT03389230 | Memory-Enriched T Cells in Treating Patients with Recurrent or Refractory Grade III-IV Glioma             | Recruiting              | Glioblastoma; Malignant Glioma; Recurrent Glioma; Refractory Glioma; WHO Grade III Glioma                                                                                                                                                | HER2(EQ)BBζ/CD19t+ T cells Leukapheresis                                                                                                                                                                                               | Phase 1        | 42         | 14-Aug-18  |
| NCT03170141 | Immunogene-modified T (IgT) Cells Against Glioblastoma Multiforme                                         | Enrolling by invitation | Glioblastoma Multiforme of Brain; Glioblastoma Multiforme                                                                                                                                                                                | Antigen-specific IgT cells                                                                                                                                                                                                             | Phase 1        | 20         | 31-May-19  |

|             |                                                                                                                                                                                                                                                                 |                        |                                                                                                                   |                                                                                                                                                                                         |         |    |           |
|-------------|-----------------------------------------------------------------------------------------------------------------------------------------------------------------------------------------------------------------------------------------------------------------|------------------------|-------------------------------------------------------------------------------------------------------------------|-----------------------------------------------------------------------------------------------------------------------------------------------------------------------------------------|---------|----|-----------|
| NCT04003649 | IL13Ra2-CAR T Cells with or without Nivolumab and Ipilimumab in Treating Patients With GBM                                                                                                                                                                      | Recruiting             | Recurrent Glioblastoma; Refractory Glioblastoma                                                                   | IL13Ralpha2-specific Hinge-optimized 4-1BB-co-stimulatory CAR/Truncated CD19-expressing Autologous TN/MEM Cells  Ipilimumab Nivolumab                                                   | Phase 1 | 60 | 26-Sep-19 |
| NCT04099797 | C7R-GD2.CAR T Cells for Patients with GD2-expressing Brain Tumors (GAIL-B)                                                                                                                                                                                      | Recruiting             | Diffuse Intrinsic Pontine Glioma; High Grade Glioma; Embryonal Tumor; Ependymal Tumor                             | Genetic: (C7R)-GD2.CART cells Cyclophosphamide Fludarabine                                                                                                                              | Phase 1 | 34 | 3-Feb-20  |
| NCT04214392 | Chimeric Antigen Receptor (CAR) T Cells with a Chlorotoxin Tumor-Targeting Domain for the Treatment of MMP2+ Recurrent or Progressive Glioblastoma                                                                                                              | Recruiting             | Recurrent Glioblastoma; Recurrent Malignant Glioma; Recurrent WHO Grade II Glioma; Recurrent WHO Grade III Glioma | Chlorotoxin (EQ)-CD28-CD3zeta-CD19t-expressing CAR T-lymphocytes (via ICT delivery)<br><br>Chlorotoxin (EQ)-CD28-CD3zeta-CD19t-expressing CAR T-lymphocytes (via ICT/ICV dual delivery) | Phase 1 | 36 | 26-Feb-20 |
| NCT05063682 | The Efficacy and Safety of Brain-targeting Immune Cells (EGFRvIII-CAR T Cells) in Treating Patients with Leptomeningeal Disease from Glioblastoma. Administering Patients EGFRvIII -CAR T Cells May Help to Recognize and Destroy Brain Tumor Cells in Patients | Active, not recruiting | Glioblastoma; Glioblastoma Multiforme; Glioma, Malignant                                                          | BEGFRvIII-specific hinge-optimized CD3 ζ-stimulatory/41BB-co-stimulatory Chimeric Antigen Receptor autologous T-lymphocytes                                                             | Phase 1 | 10 | 15-May-20 |
| NCT04550663 | NKG2D CAR-T(KD-025) in the Treatment of Relapsed or Refractory NKG2DL+ Tumors                                                                                                                                                                                   | Not yet recruiting     | Solid Tumor; Hepatocellular Carcinoma; Colorectal Cancer; Glioma                                                  | KD-025 CAR-T cells                                                                                                                                                                      | Phase 1 | 10 | 25-Sep-20 |
| NCT05131763 | NKG2D-based CAR T-cells Immunotherapy for Patient With r/r NKG2DL+ Solid Tumors                                                                                                                                                                                 | Recruiting             | Hepatocellular Carcinoma; Glioblastoma; Medulloblastoma; Colon Cancer                                             | NKG2D-based CAR T-cells                                                                                                                                                                 | Phase 1 | 3  | 1-Mar-21  |
| NCT04661384 | Brain Tumor-Specific Immune Cells (IL13Ralpha2-CAR T Cells) for the Treatment of Leptomeningeal Glioblastoma, Ependymoma, or Medulloblastoma                                                                                                                    | Recruiting             | Ependymoma; Glioblastoma; Medulloblastoma; Recurrent Metastatic Malignant Neoplasm in the Leptomeninges           | IL13Ralpha2-specific Hinge-optimized 41BB-co-stimulatory CAR Truncated CD19-expressing Autologous T-Lymphocytes                                                                         | Phase 1 | 30 | 5-Mar-21  |
| NCT05241392 | Safety and Efficacy Study of Anti-B7-H3 CAR-T Cell Therapy for Recurrent Glioblastoma                                                                                                                                                                           | Recruiting             | Glioblastoma                                                                                                      | B7-H3-targeting CAR-T cells                                                                                                                                                             | Phase 1 | 30 | 27-Jan-22 |
| NCT05474378 | B7-H3 Chimeric Antigen Receptor T Cells (B7-H3CART) in Recurrent Glioblastoma Multiforme                                                                                                                                                                        | Recruiting             | Brain and Nervous System                                                                                          | B7-H3CART                                                                                                                                                                               | Phase 1 | 39 | 12-Jul-22 |

|             |                                                                                                                            |                    |                                                                                                                                                                                                                                                                                                                |                                                                                                                                                 |                 |    |           |
|-------------|----------------------------------------------------------------------------------------------------------------------------|--------------------|----------------------------------------------------------------------------------------------------------------------------------------------------------------------------------------------------------------------------------------------------------------------------------------------------------------|-------------------------------------------------------------------------------------------------------------------------------------------------|-----------------|----|-----------|
| NCT05540873 | A Clinical Study of IL13Ra2 Targeted CAR-T in Patients With Malignant Glioma (MAGIC-I)                                     | Recruiting         | Recurrent Malignant Glioma                                                                                                                                                                                                                                                                                     | YYB-103                                                                                                                                         | Phase 1         | 18 | 18-Jul-22 |
| NCT05366179 | Autologous CAR-T Cells Targeting B7-H3 in Recurrent or Refractory GBM CAR.B7-H3Tc                                          | Recruiting         | Glioblastoma Multiforme                                                                                                                                                                                                                                                                                        | CAR.B7-H3T cells infusion                                                                                                                       | Phase 1         | 36 | 2-Sep-22  |
| NCT05353530 | Phase I Study of IL-8 Receptor-modified CD70 CAR T Cell Therapy in CD70+ and MGMT-unmethylated Adult Glioblastoma (IMPACT) | Not yet recruiting | Glioblastoma                                                                                                                                                                                                                                                                                                   | Ex-Vivo expanded autologous IL-8 receptor (CXCR2) modified CD70 CAR (8R-70CAR) T cells                                                          | Phase 1         | 18 | Oct-22    |
| NCT05577091 | Tris-CAR-T Cell Therapy for Recurrent Glioblastoma                                                                         | Not yet recruiting | Recurrent Glioblastoma                                                                                                                                                                                                                                                                                         | Inverse correlated dual-target, truncated IL7Ra modified CAR - expressing autologous T-lymphocytes                                              | Phase 1         | 10 | 1-Nov-22  |
| NCT05168423 | CART-EGFR-IL13Ra2 in EGFR Amplified Recurrent GBM                                                                          | Not yet recruiting | Glioblastoma                                                                                                                                                                                                                                                                                                   | 5x10(7) CART-EGFR-IL13Ra2<br>1x107 CART-EGFR-IL13Ra2<br>1x10(8) CART-EGFR-IL13Ra2<br>5x108 CART-EGFR-IL13Ra2<br>Cyclophosphamide<br>Fludarabine | Phase 1         | 18 | 19-Mar-23 |
| NCT03638206 | Autologous CAR-T/TCR-T Cell Immunotherapy for Malignancies                                                                 | Recruiting         | B-cell Acute Lymphoblastic Leukemia;<br>Lymphoma;<br>Myeloid Leukemia;<br>Multiple Myeloma;<br>Hepatoma;<br>Gastric Cancer;<br>Pancreatic Cance;<br>Mesothelioma;<br>Colorectal Cancer;<br>Esophagus Cancer;<br>Lung Cancer<br>Glioma;<br>Melanoma;<br>Synovial Sarcoma;<br>Ovarian Cancer;<br>Renal Carcinoma | CAR-T cell immunotherapy                                                                                                                        | Phase 1 Phase 2 | 73 | 1-Mar-18  |
| NCT03941626 | Autologous CAR-T/TCR-T Cell Immunotherapy for Solid Malignancies                                                           | Recruiting         | Esophagus Cancer;<br>Hepatoma;<br>Glioma;<br>Gastric Cancer                                                                                                                                                                                                                                                    | CAR-T/TCR-T cells immunotherapy                                                                                                                 | Phase 1 Phase 2 | 50 | 1-Sep-19  |
| NCT04077866 | B7-H3 CAR-T for Recurrent or Refractory Glioblastoma                                                                       | Recruiting         | Recurrent Glioblastoma;<br>Refractory Glioblastoma                                                                                                                                                                                                                                                             | Temozolomide<br>B7-H3 CAR-T                                                                                                                     | Phase 1 Phase 2 | 40 | 1-May-22  |

Results obtained from clinicaltrials.gov by searching entries with Glioma OR GBM OR Glioblastoma AND CAR-T Therapy and selecting relevant studies (Excluding missing info, unknown status, and pediatric tumors)
